# Supplementary material for: VELCRO-IP RNA-seq reveals ribosome expansion segment function in translation genome-wide
Source: PubMed Central journal article supplement (PMC8270675; doi:10.1016/j.celrep.2020.108629), 2021-01-19
Supplement: NIHMS1664954-supplement-1.pdf [file NIHMS1664954-supplement-1.pdf]

**Cell Reports, Volume 34**

**Supplemental Information**

**VELCRO-IP RNA-seq reveals  
ribosome expansion segment function  
in translation genome-wide**

**Kathrin Leppek, Gun Woo Byeon, Kotaro Fujii, and Maria Barna**

## **SUPPLEMENTAL INFORMATION**

### **VELCRO-IP RNA-seq reveals ribosome expansion segment function in translation genome-wide**

Kathrin Leppek<sup>1,2,3</sup>, Gun Woo Byeon<sup>1,2,3</sup>, Kotaro Fujii<sup>1,2</sup>, Maria Barna<sup>1,2,4,\*</sup>

<sup>1</sup> Department of Developmental Biology, Stanford University, Stanford, California 94305, USA

<sup>2</sup> Department of Genetics, Stanford University, Stanford, California 94305, USA

<sup>3</sup> These authors contributed equally

<sup>4</sup> Lead Contact

\* Correspondence: [mbarna@stanford.edu](mailto:mbarna@stanford.edu)

#### **This document includes:**

Figures S1 to S6

Tables S1 to S3

#### **Other supplementary material for this manuscript includes the following:**

Table S4: mRNA regions enriched by VELCRO-IP RNA-seq

Table S5: GO term analysis for all genes enriched with hES9S

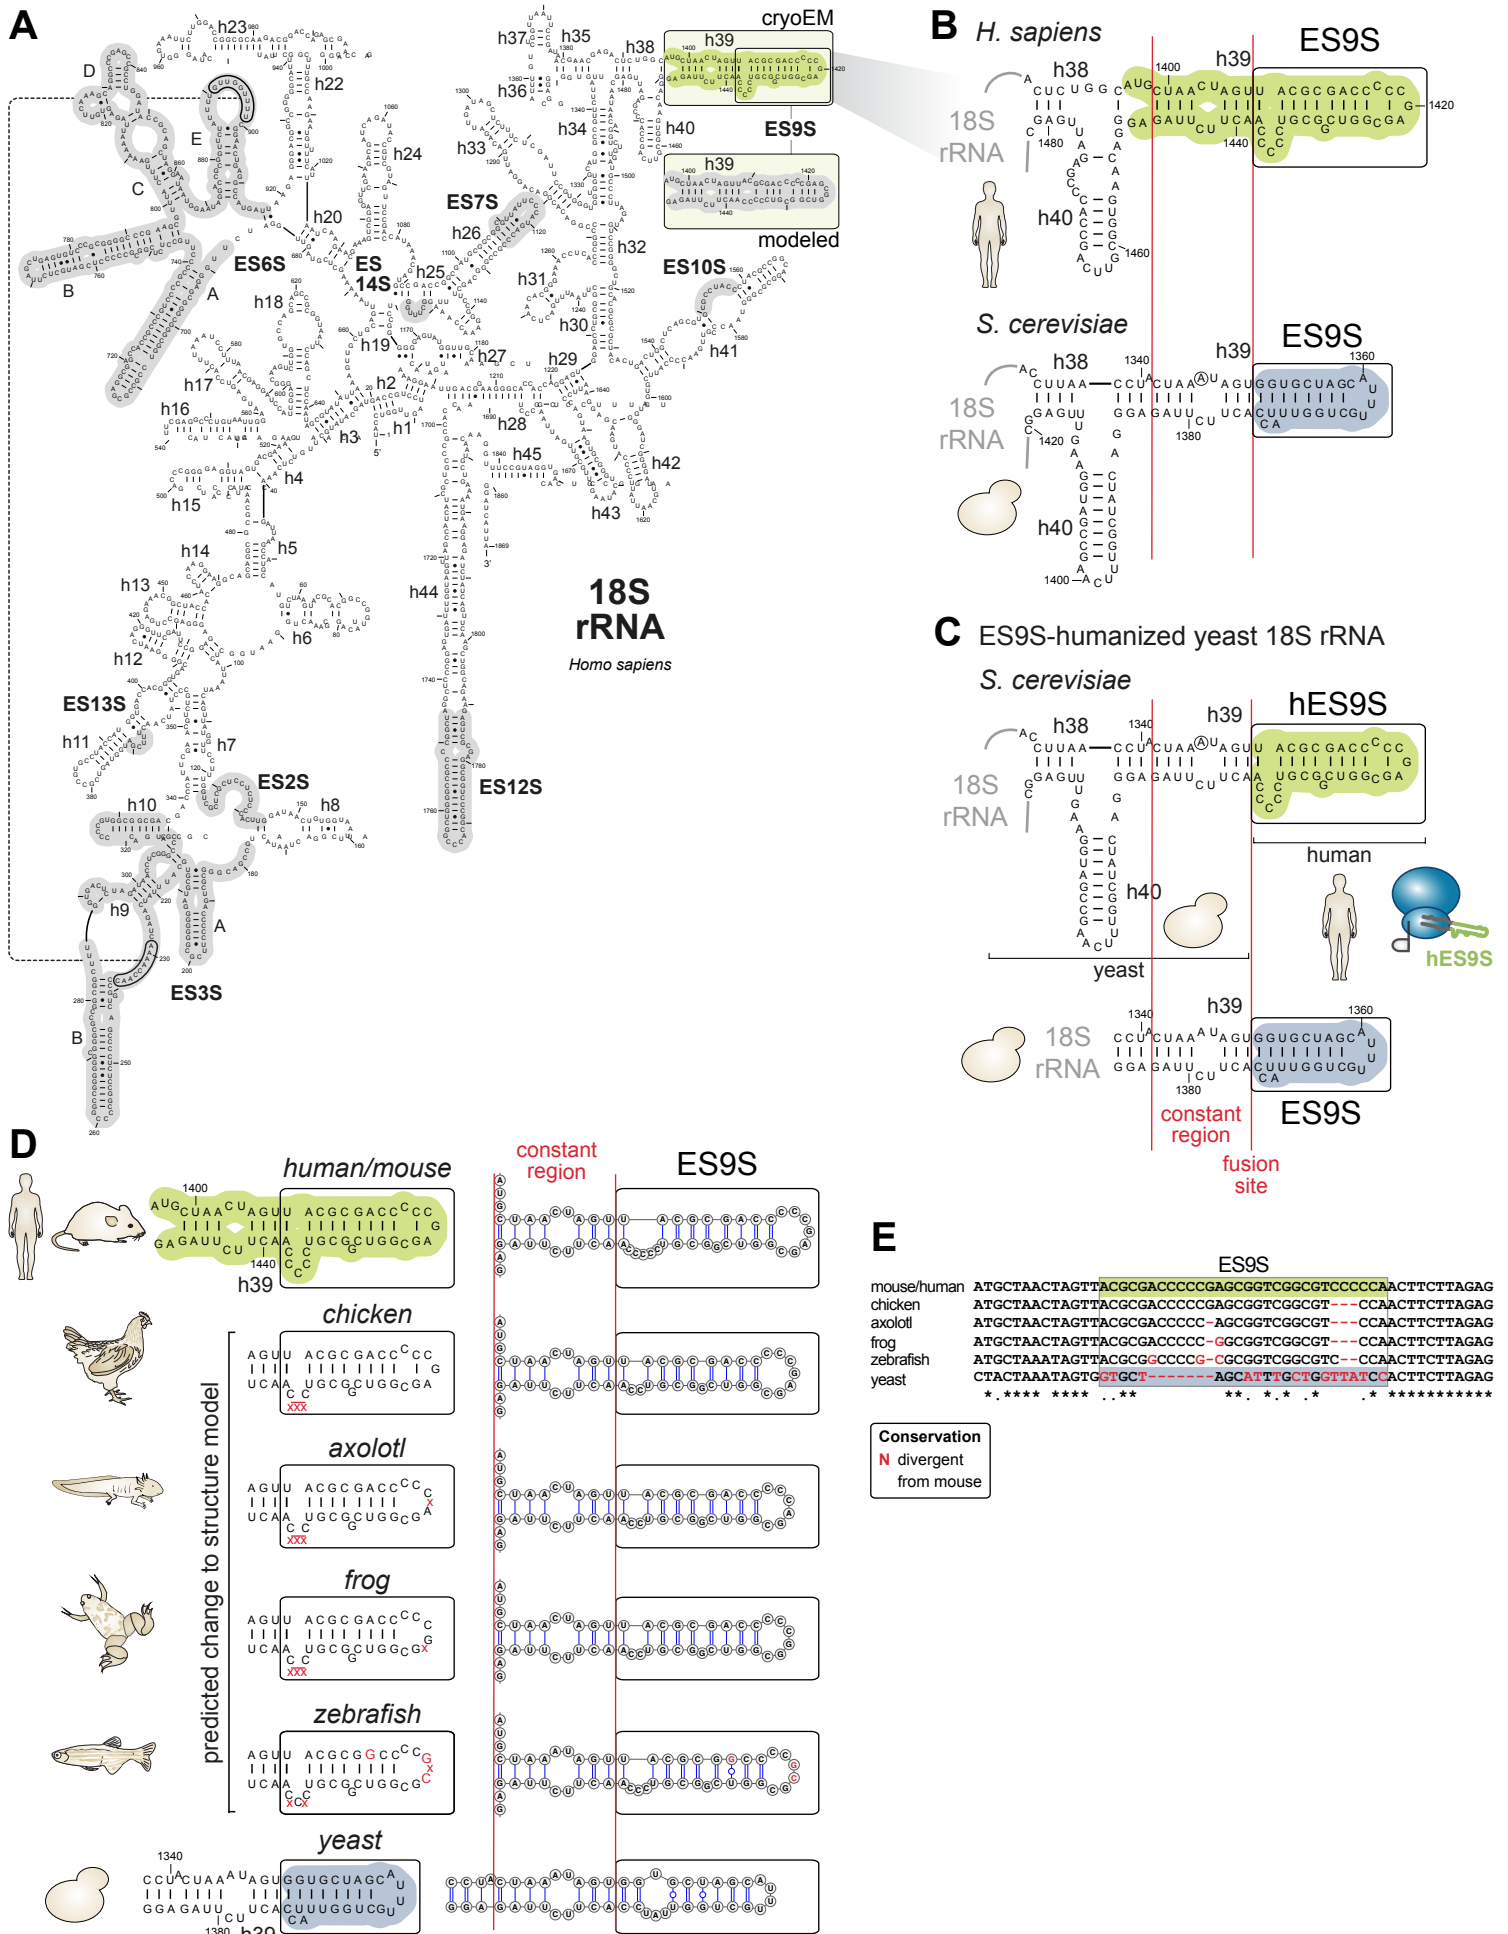

**Figure S1. Confirmation of interspecies sequence variation of ES9S rRNA region. Related to Figure 1.**

(A) Secondary structure model of the human (*H. sapiens*) 18S rRNA adapted from (Anger et al., 2013). rRNA expansion segment regions are highlighted in grey. Nucleotide positions, helices and ESs are numbered. The boxed region shows the ES9S structure based on either our cryo-EM data (green; (Leppek et al., 2020)) or based on a previous model (grey; (Anger et al., 2013)).

(B) Secondary structure models of the human and baker's yeast (*S. cerevisiae*) 18S rRNA region containing ES9S, highlighted in green and blue, respectively. The structure of the distal human ES9S (boxed region in A and B) was revised based on cryo-EM data (Leppek et al., 2020).

(C) Secondary structure model of the engineered yeast 18S rRNA after exchange of the yeast ES9S with the human one (hES9S, green). Constant region (h39) and ES9S-fusion site selected for engineering chimeric 18S rRNA are indicated in red.

(D) Predicted structural changes in the ES9S region of 18S rRNA across different species. Sequence changes and their predicted effects on the ES9S structure are indicated in red. Human/mouse ES9S (identical sequence) is the reference for the comparison. The variable sequences across the species are obtained by RT-PCR from total RNA extracts of the different species (E11.5, stage E11.5 FVB mouse embryo; chicken, *Gallus gallus*; axolotl, *Ambystoma mexicanum*; frog, X. l., *Xenopus laevis*; zebrafish, *Danio rerio*; yeast, S. c., *Saccharomyces cerevisiae*) using primers specific for the 18S rRNA region containing ES9S in the center (see **Figure 1A-C**, partially reproduced from **Figure 1A**). Secondary structures of ES9S of different species were modeled using Vienna RNAfold (<http://rna.tbi.univie.ac.at>) and visualized using VARNA (<http://varna.lri.fr>) with default settings.

(E) Multiple sequence alignment of RT-PCR-confirmed ES9S sequences from the different species used for the structure models in (D). Partially reproduced from **Figure 1C**.

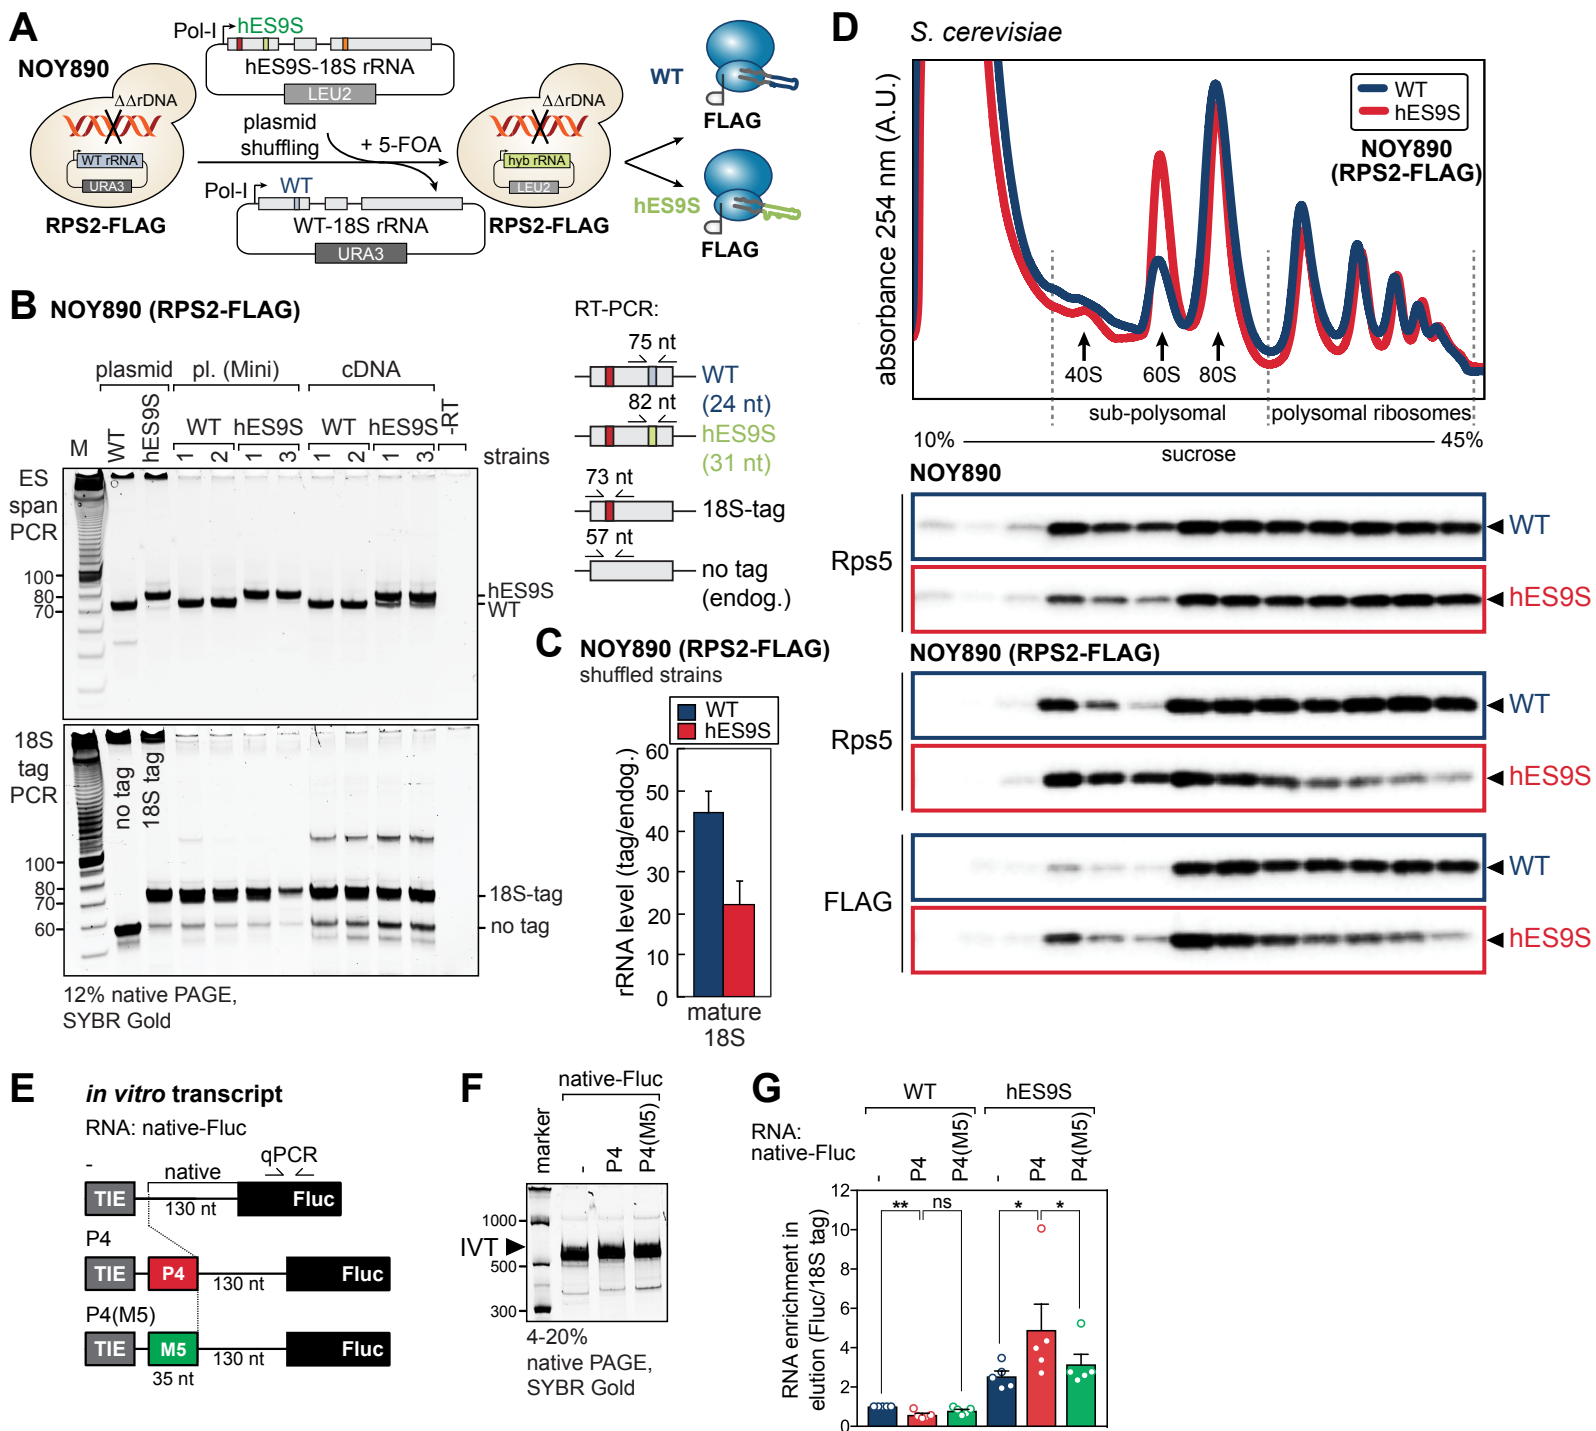

**Figure S2. Plasmid shuffling and yeast strain characterization; and VELCRO-IP qRT-PCR serves as a proof-of-principle to identify novel hES9S-interacting 5' UTRs. Related to Figure 1, 2, 3.**

(A) A yeast strain containing the plasmid-encoded chimeric 18S rRNA is generated by plasmid shuffling. Schematic of the plasmid shuffling approach to generate yeast strains (NOY890, RPS2-FLAG) that contain a homozygous knock-out of the rDNA locus (NOY890), resulting in rRNA transcription exclusively from the plasmids. All rDNA plasmids contain unique 18S and 25S rRNA sequence tags. 5-FOA-based selection of transformed yeast cells allows for isolation of clones that retain a transformed *LEU2*-plasmid (pNOY373) and lost the original *URA3*-plasmid (pNOY373). Successful plasmid exchange from *URA3* (WT) to *LEU2* (tagged WT or hES9S)-plasmids in isolates is achieved by growth on SD-*LEU2*, and SD+5-FOA but not on SD-*LEU/URA*.

(B) RT-PCR analysis using ES9S-specific primers that span ES9S allow analysis of expression of WT or hES9S 18S rRNA since there is a 7 nt difference in the length of the PCR products between WT and hES9S (ES span PCR). Similarly, the presence of the 18S tag can be distinguished from WT rRNA (18S tag PCR). Total RNA for cDNA synthesis or plasmid DNA was extracted from clones and used for RT-PCR. Plasmid-derived PCR products serve as controls. PCR products were resolved by 12% native PAGE and stained with SYBR Gold. Two independent isolates of tagged-WT and tagged-hES9S strains (NOY890/RPS2-FLAG background) used in this study are presented. RT-PCR specific for the 18S rRNA tag confirms the presence of the tag in transformed plasmid-derived mature 18S rRNA. A 10 bp DNA ladder (Invitrogen) was loaded as reference.

(C) Yeast strain characterization after plasmid shuffling and isolation of clones. qRT-PCR analysis with specific primers for rRNA tags and endogenous rRNAs is used to quantify tag/endogenous rRNA levels (i.e. the substitution rates of WT with tagged-WT or tagged-hES9S ribosomes present in isolated strains). For NOY890/RPS2-FLAG strains, the qRT-PCR analysis determined that only one endogenous plasmid-derived WT ribosomes still remained per every 44 tagged WT or every 22 tagged hES9S ribosomes.

(D) Sucrose gradient fractionation analysis of yeast lysates derived from WT and hES9S-stains in the background of NOY890 and NOY890/RPS2-FLAG, containing scarless C-terminal Rps2-FLAG (Jan et al., 2014), on 10-45% sucrose gradients (n = 3). Compared to WT rRNA-containing cells, humanized ribosome-containing cells show a slight growth defect. Polysome traces demonstrate proper ribosomal assembly. Incorporation of the FLAG tag into polysomes demonstrates its non-perturbative nature.

(E) Schematic of *in vitro* transcripts used for the proof-of-principle experiment of the VELCRO-IP qRT-PCR. Reproduced from **Figure 3B**.

(F) For qualitative analysis of the integrity of *in vitro* transcripts, RNAs were subjected to 4-20% polyacrylamide/TBE/native PAGE and visualized by SYBR Gold staining.

(G) Analysis of total RNA in the 3xFLAG peptide elution by qRT-PCR using same volumes of RNA per sample for the RT. Normalization of Ct values for Fluc to the 18S rRNA tag internally controls for ribosome-IP efficiency per sample. The native/WT sample was used to normalize for fold enrichment of RNA binding (set to 1). The same data as in **Figure 3D** is plotted differently. Average RNA fold enrichment, SEM, n = 5; ns, not significant.

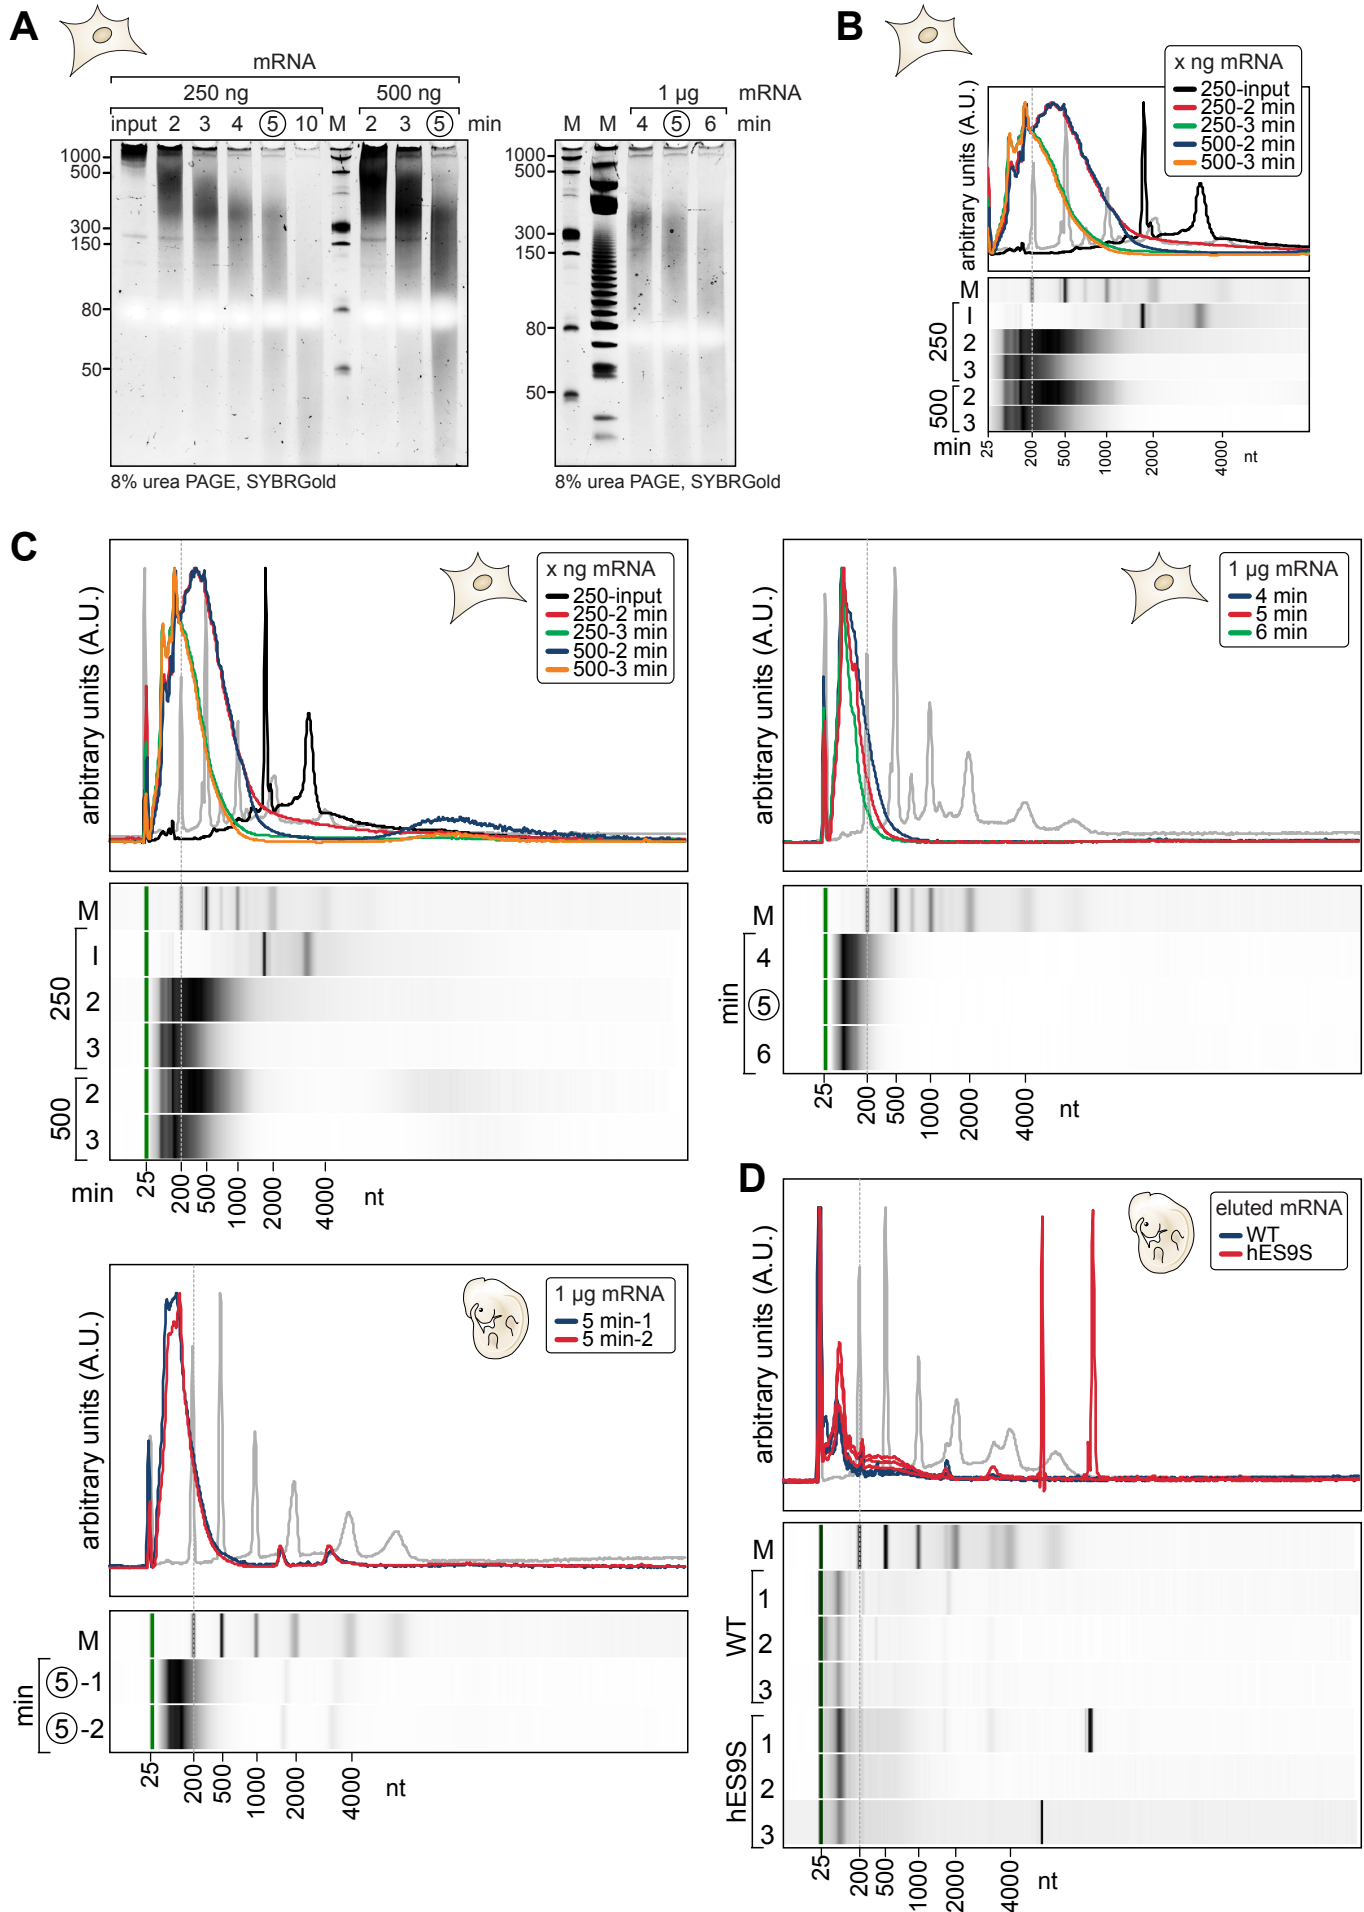

**Figure S3. Controlled mRNA fragmentation. Related to Figure 3.**

(A) Fragmented mouse mRNA from C3H/10T1/2 cells in different amounts (250 ng, 500 ng, and 1  $\mu$ g) and timepoints of fragmentation, analyzed by 8% denaturing urea PAGE and visualized by SYBR Gold. The left-most lane shows the 250 ng mRNA input without fragmentation for reference. Ladders: Low Range ssRNA Ladder (NEB); 20 bp Bayou DNA Ladder (Bayou Biolabs).

(B) Fragmented mouse mRNA from C3H/10T1/2 cells in different amounts (250 and 500 ng) and timepoints of fragmentation (2 and 3 min) and the 250 ng mRNA input, analyzed on a mRNA Pico Chip (Agilent) on a Bioanalyzer (Agilent). Zoomed-in view of the Bioanalyzer quantification (top) and virtual gel images (bottom) is shown. Grey line plots the marker (lane M in virtual gel images) for reference. See also (C).

(C) Optimization of mouse mRNA fragmentation from C3H/10T1/2 cells and stage E11.5 mouse embryos. Full views of the Bioanalyzer (Agilent) analyses shown in **Figures S3B, 3F and 3G**. Grey lines plot the markers (lane M in virtual gel images) for reference.

(D) Full view of the Bioanalyzer (Agilent) quantification and virtual gel images in **Figure 4B** is shown for the eluted and yeast rRNA-depleted mouse embryo RNA from three independent replicates of WT and hES9S VELCRO-IP experiments. Grey lines plot the markers (lane M in virtual gel images) for reference.



**A** VELCRO-IP: reproducibility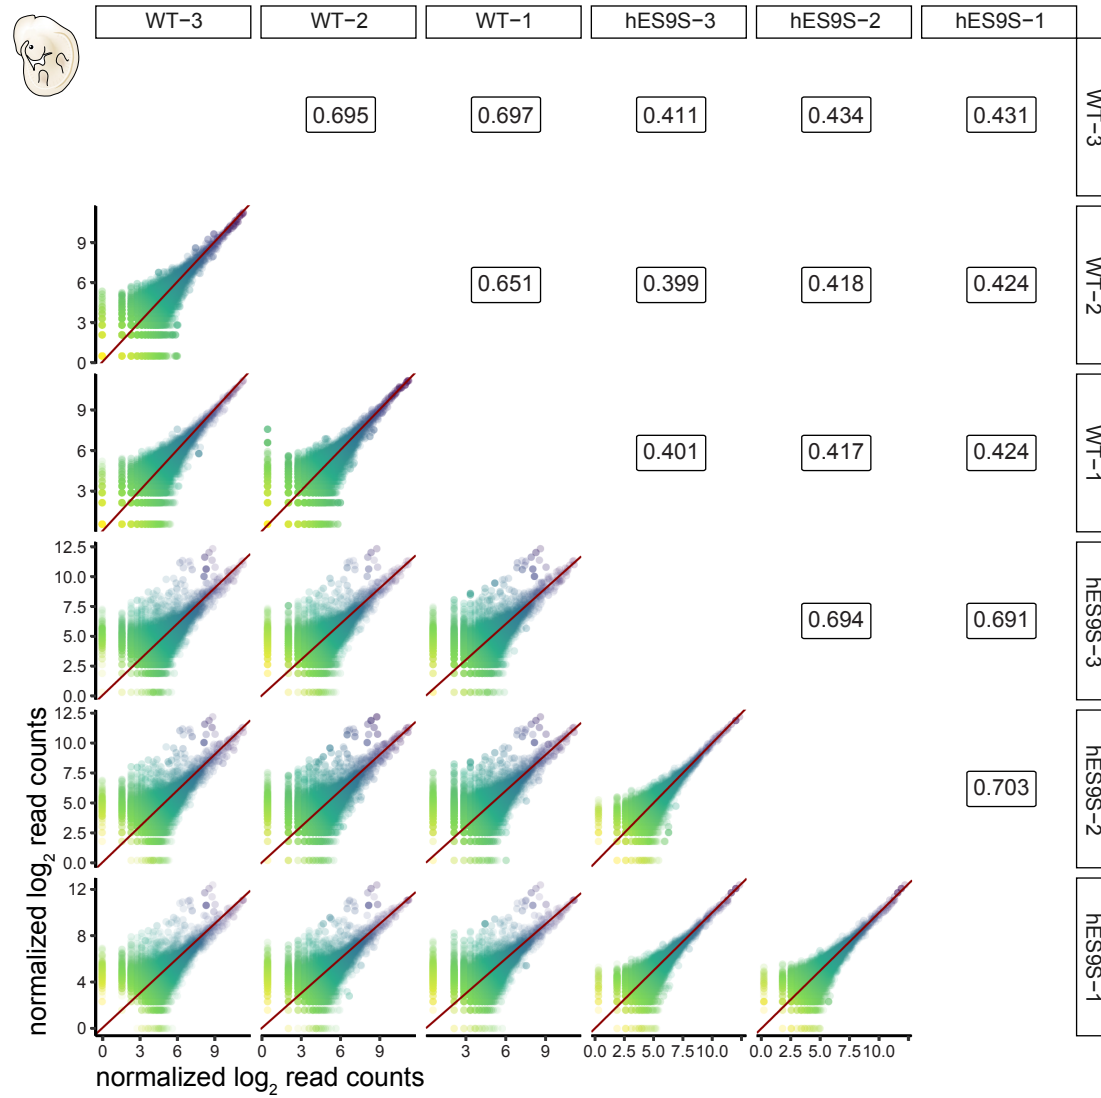**B** VELCRO-IP: enriched mRNA fragments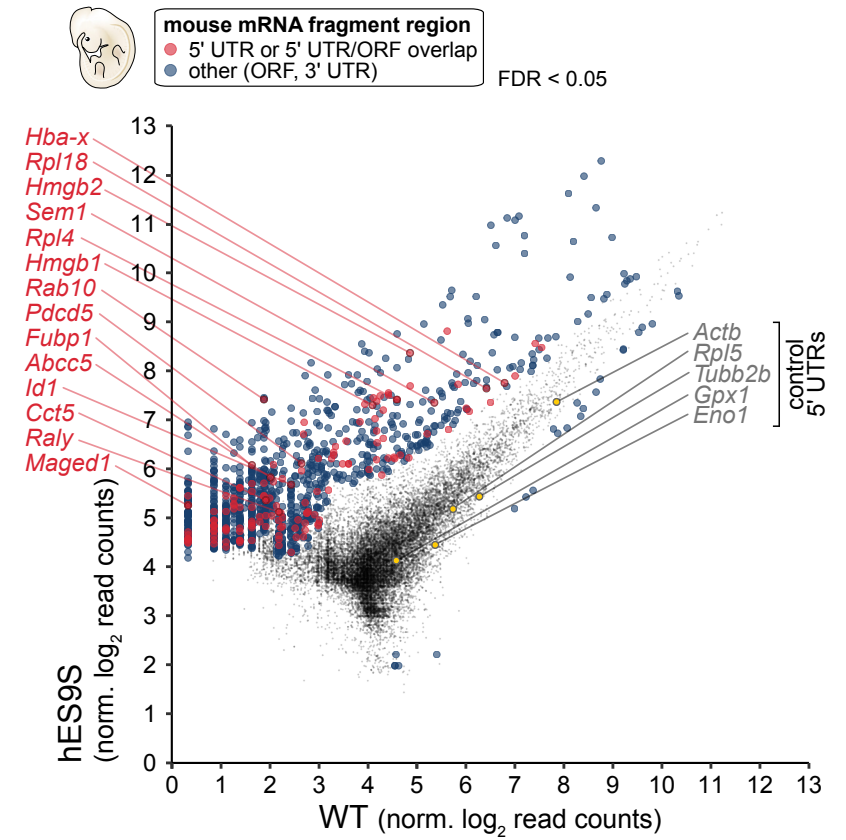

**Figure S4. Reproducibility of VELCRO-IP RNA-seq and identification of hES9S-interacting 5' UTRs. Related to Figure 4.**

(A) A matrix comparing every possible pair of individual VELCRO-IP RNA-seq samples (three replicate samples per condition, hES9S and WT). Lower triangle: scatter plots of normalized log read counts, colored by expression level. Upper triangle: Pearson correlation coefficient.

(B) RNA-seq results of independent replicates ( $n = 3$ ) for each WT and hES9S samples. Normalized log read counts are presented for WT and hES9S-enriched mRNA fragments. Fragments less than  $FDR < 0.05$  are colored according to the region in the mRNA. Fragments mapping to 5' UTR and overlapping 5' UTR/ORF (red) are highlighted compared to other regions (ORF and 3' UTR, blue). We label mouse genes for which we identified enriched fragments in the 5' UTR and/or 5' region of the ORF and for whose 5' UTRs we performed validation experiments. Five control 5' UTRs are highlighted in yellow that are equally bound to both WT and hES9S 40S subunits and served as negative controls. Corresponds to **Figure 4E**. See also **Table S4**.

### A GO term (biological process) for enriched ORF

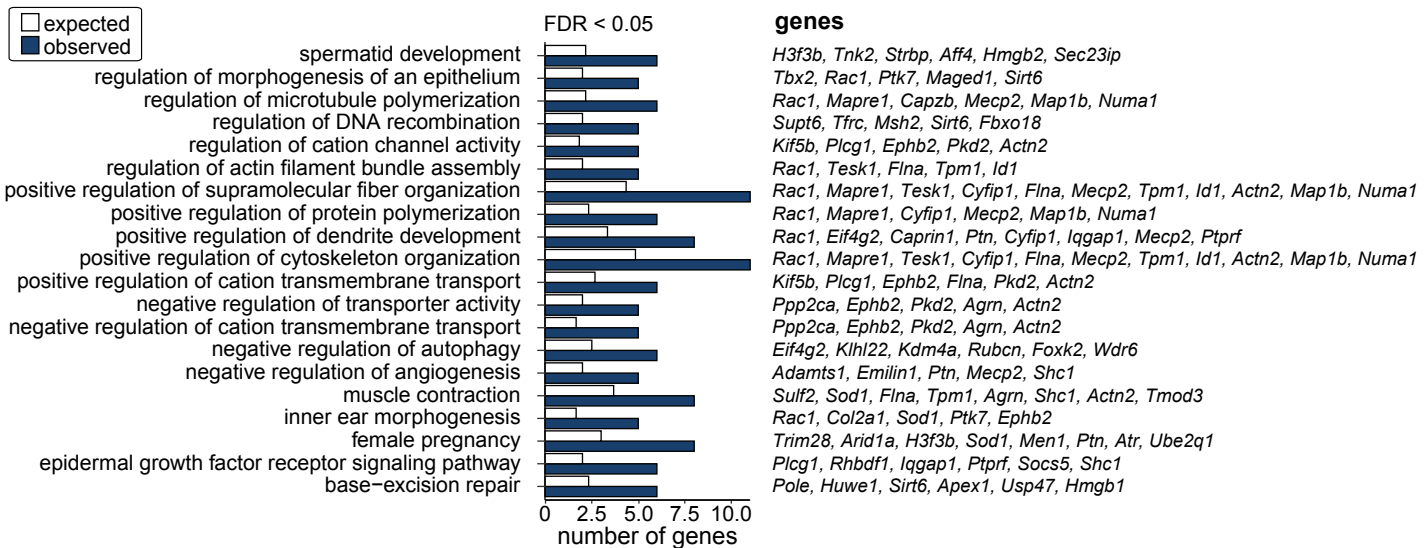

### B GO term (biological process) for enriched 3' UTRs

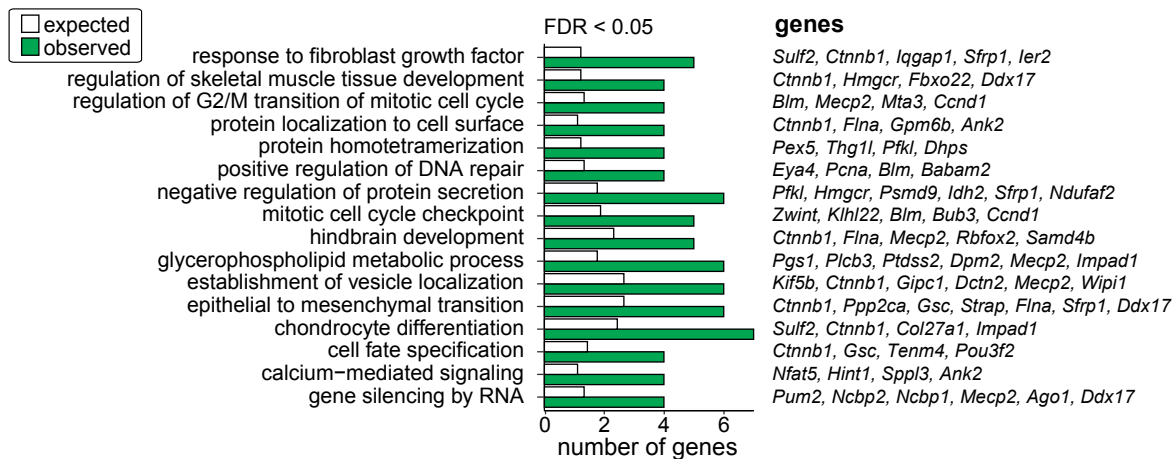

### C GO term (biological process) for enriched mRNA (all regions)

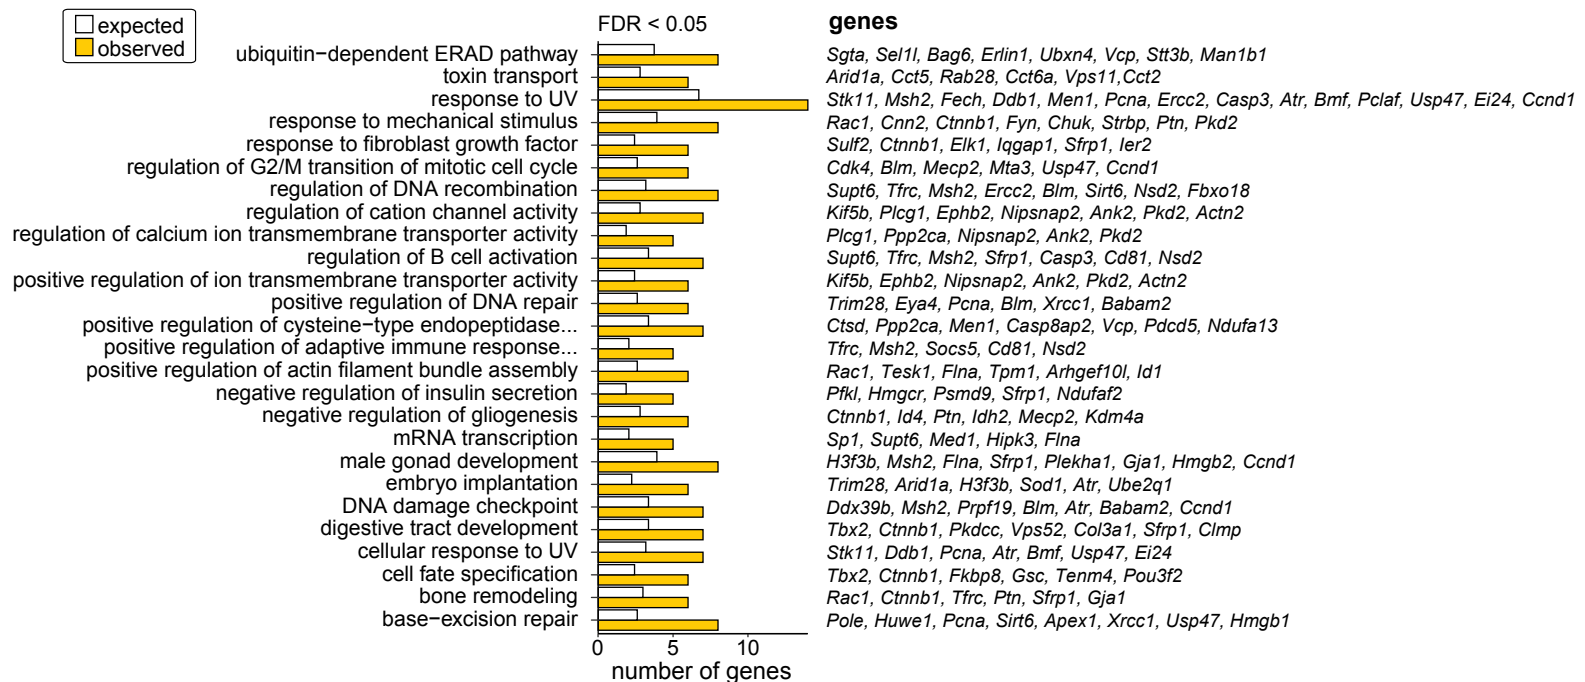

**Figure S5. GO-terms of hES9S-interacting mRNA regions. Related to Figure 4.**

(A) GO term analysis as in **Figure 4H** for biological process of ORF regions (FDR < 0.05, n = 3) enriched by hES9S. Displayed are the expected and observed frequency of genes for the significant terms (FDR < 0.05, expressed mRNA regions were used as the background; see methods for details of the thresholds used). Also see **Table S5**.

(B) GO term analysis as in (A) for biological process of 3' UTR regions (FDR < 0.05, n = 3) enriched by hES9S.

(C) GO term analysis as in (A) for biological process of the full mRNA (any region) (FDR < 0.05, n = 3) enriched by hES9S.

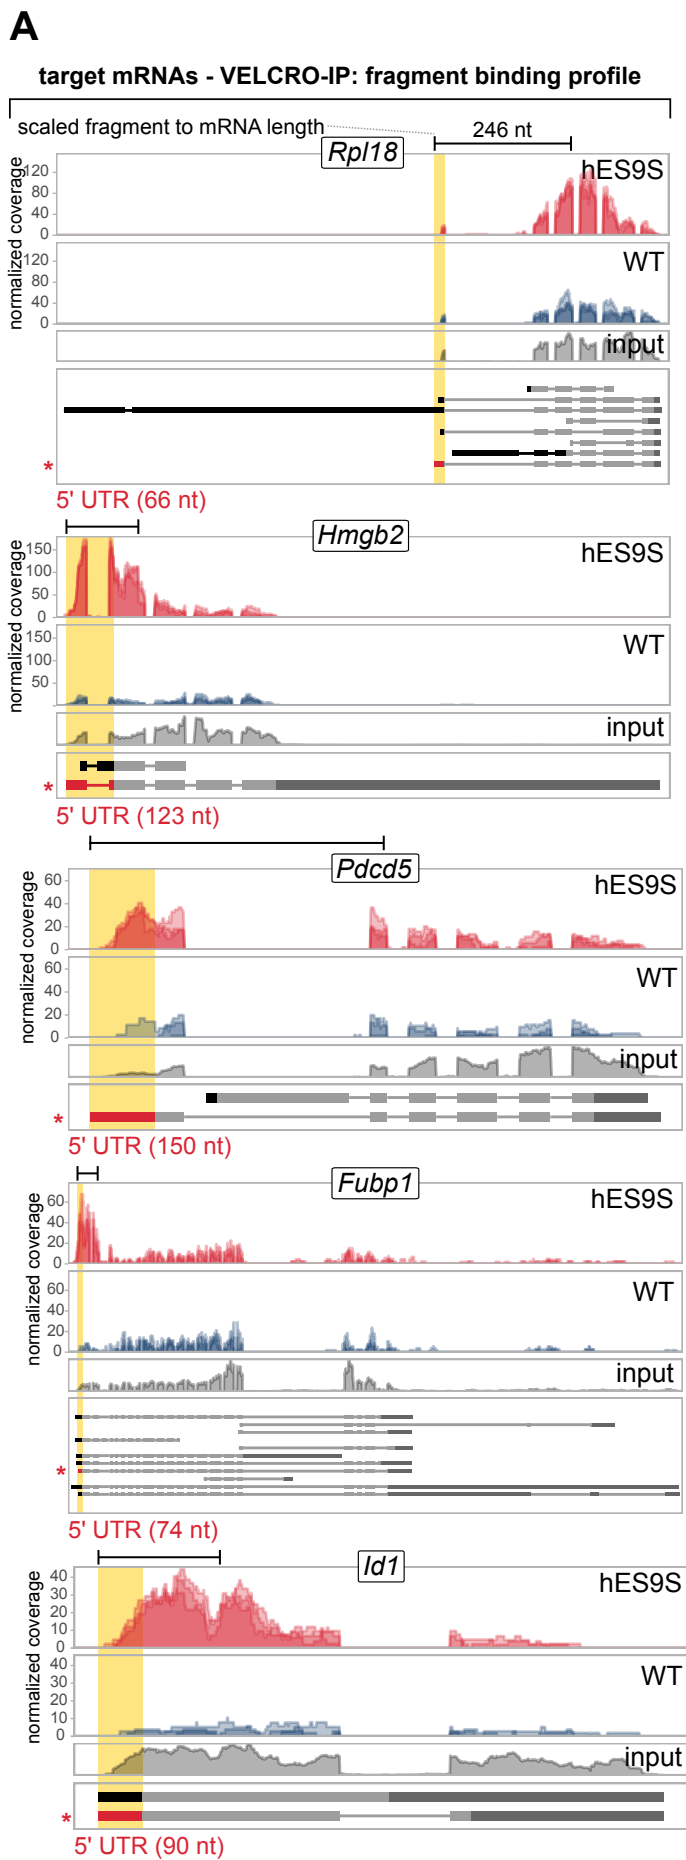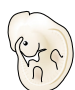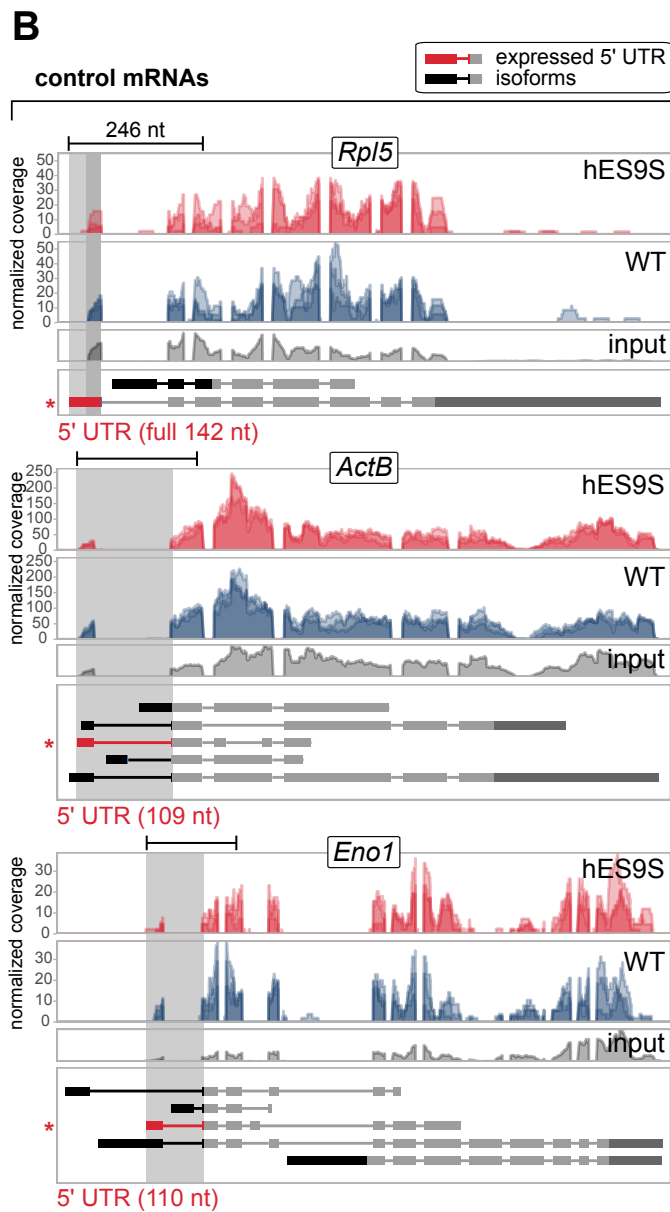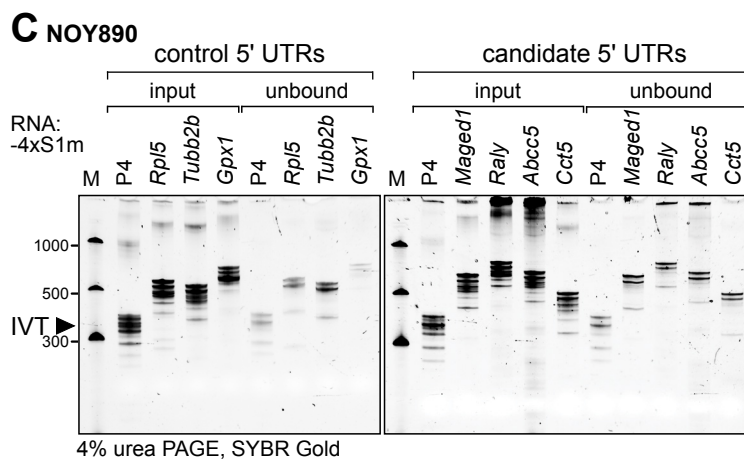

**Figure S6. VELCRO-IP mRNA binding pattern and validation of hES9S-interacting 5' UTRs. Related to Figure 5, 6.**

(A) mRNA binding profile as coverage plots for candidate hES9S-target genes whose 5' UTR-overlapping windows are significantly enriched in the hES9S over WT samples (FDR < 0.05, n = 3). The other five out of the total tested 14 genes not shown in **Figure 5C, D** are shown here. Normalized per base coverage of individual biological replicate libraries for WT (blue) and hES9S (red) samples is plotted (above). All mRNA isoforms annotated in ENSEMBL are displayed below. Exon lengths are to scale while intron lengths are pseudo-scaled. The read coverage of the input mRNA fragments (grey) are also plotted for reference. 5' UTR regions for the most likely expressed mRNA isoform in embryos is highlighted in red and the corresponding regions in the tracks is shaded in yellow. The 5' UTR region picked for further experimental validation corresponds to the asterisk-marked isoform. The mRNA fragment length for each gene is scaled according to the mRNA length for the individual genes presented. See also **Figure 5C**.

(B) The same analysis as in (A) was performed for the other three of total five control 5' UTRs where no enrichment of hES9S interaction over WT was found. 5' UTR regions for the most likely expressed mRNA isoform in embryos is highlighted in red and the corresponding regions in the tracks are shaded in gray. Corresponds to **Figure 5D**.

(C) A 4xS1m pulldown experiment with the focus on the comparison of full-length control and candidate hES9S-interacting 5' UTRs for their ability to bind to tagged-WT and tagged-humanized 40S subunits was performed. *In vitro* transcribed RNAs fused to 4xS1m aptamers were coupled to SA-sepharose beads for 4xS1m pulldown using WT and hES9S ribosome expressing yeast strains to generate cellular extracts as input. Coupled beads were incubated with cell extracts, washed and eluted using RNase A to release RNA-bound proteins. Input and unbound samples were taken before and after incubation of RNAs with beads. To monitor coupling efficiency, 10% of the input and unbound RNA fraction of each sample was resolved by 4% denaturing polyacrylamide/TBE/urea PAGE and visualized by SYBR Gold. Representative of n = 3 is shown. Low Range ssRNA Ladder (NEB) was loaded for reference. Corresponds to **Figure 6B**.

## SUPPLEMENTAL TABLES

**Table S1: Plasmids used in this study. Related to STAR Methods.**

All plasmids used for *in vitro* transcription and mammalian transient transfection or yeast transformation are listed in the table.

| <b>Table S1. List of plasmids</b>               |                                               |                              |
|-------------------------------------------------|-----------------------------------------------|------------------------------|
| <b>Plasmid</b>                                  | <b>Notes</b>                                  | <b>Reference</b>             |
| <b><i>In vitro</i> transcription constructs</b> |                                               |                              |
| pSP73                                           | SP6 promoter, kindly provided by G. Stoecklin | Promega                      |
| pSP73-4xS1m                                     | p2880, kindly provided by G. Stoecklin        | (Leppek and Stoecklin, 2014) |
| pSP73-4xS1m(MCS)                                |                                               | (Leppek et al., 2020)        |
| pSP73-a9(P4)-4xS1m(MCS)                         |                                               | (Leppek et al., 2020)        |
| pSP73-Rpl5-4xS1m(MCS)                           |                                               | This study                   |
| pSP73-Tubb2b-4xS1m(MCS)                         |                                               | This study                   |
| pSP73-Gpx1-4xS1m(MCS)                           |                                               | This study                   |
| pSP73-Maged1-4xS1m(MCS)                         |                                               | This study                   |
| pSP73-Raly-4xS1m(MCS)                           |                                               | This study                   |
| pSP73-Abcc5-4xS1m(MCS)                          |                                               | This study                   |
| pSP73-Cct5-4xS1m(MCS)                           |                                               | This study                   |
| <b><i>Mammalian cells</i></b>                   |                                               |                              |
| <b>Expression constructs</b>                    |                                               |                              |
| pRF                                             | SV40 promoter, kindly provided by D. Ruggero  |                              |
| pRF-HCV IRES                                    | kindly provided by D. Ruggero                 |                              |
| pRF-EMCV IRES                                   | kindly provided by D. Ruggero                 |                              |
| pRF-a9-IRES FL                                  |                                               | (Xue et al., 2015)           |
| pRF-a9-P4-native                                |                                               | (Leppek et al., 2020)        |
| pGL3-FLB-stop-TIE-native                        |                                               | (Leppek et al., 2020)        |
| pGL3-FLB-stop-TIE-P4-native                     |                                               | (Leppek et al., 2020)        |
| pGL3-FLB-stop-TIE-P4(M5)-native                 |                                               | (Leppek et al., 2020)        |
| pRF-Abcc5                                       | full-length 5' UTR, 199 nt                    | This study                   |
| pRF-Raly                                        | full-length 5' UTR, 289 nt                    | This study                   |
| pRF-Cct5                                        | full-length 5' UTR, 99 nt                     | This study                   |
| pRF-Maged1                                      | 184 nt most 3' of full-length 5' UTR, 184 nt  | This study                   |
| pRF-Rpl18                                       | full-length 5' UTR, 66 nt                     | This study                   |
| pRF-Hmgb2                                       | full-length 5' UTR, 123 nt                    | This study                   |
| pRF-Pdcd5                                       | full-length 5' UTR, 150 nt                    | This study                   |
| pRF-Fubp1                                       | full-length 5' UTR, 74 nt                     | This study                   |
| pRF-Id1                                         | full-length 5' UTR, 90 nt                     | This study                   |
| pRF-Hba-x                                       | full-length 5' UTR, 264 nt                    | This study                   |
| pRF-Rab10                                       | 200 nt most 3' of full-length 5' UTR, 200 nt  | This study                   |
| pRF-Sem1                                        | full-length 5' UTR, 104 nt                    | This study                   |

|                         |                                                              |                       |
|-------------------------|--------------------------------------------------------------|-----------------------|
| pRF-Hmgb1               | full-length 5' UTR, 155 nt                                   | This study            |
| pRF-Rpl4                | full-length 5' UTR, 56 nt                                    | This study            |
| pRF-Rpl5                | full-length 5' UTR, 142 nt                                   | This study            |
| pRF-ActB                | full-length 5' UTR, 109 nt                                   | This study            |
| pRF-Tubb2b              | full-length 5' UTR, 121 nt                                   | This study            |
| pRF-Eno1                | full-length 5' UTR, 110 nt                                   | This study            |
| pRF-Gpx1                | full-length 5' UTR, 238 nt                                   | This study            |
| <b>Yeast</b>            |                                                              |                       |
| <b>rDNA constructs</b>  |                                                              |                       |
| pNOY373-18S25Stag       | <i>LEU2, 2<math>\mu</math>, Pol1-rDNA- tagged rRNA</i>       | (Leppek et al., 2020) |
| pNOY373-18S25Stag-hES9S | <i>LEU2, 2<math>\mu</math>, Pol1-rDNA- tagged rRNA-hES9S</i> | (Leppek et al., 2020) |

**Table S2: Yeast strains used in this study. Related to STAR Methods.**

All yeast strains used and/or generated for this study are listed in the table.

| <b>Table S2. List of yeast strains</b> |                                                                                                                                                             |                       |
|----------------------------------------|-------------------------------------------------------------------------------------------------------------------------------------------------------------|-----------------------|
| <b>Strain</b>                          | <b>Genotype and Notes</b>                                                                                                                                   | <b>Reference</b>      |
| KAY488<br>(NOY890)                     | <i>MATA ura3-1 leu2-3,112 his3-11 trp1-1 ade2-1 can1-100 rdna<math>\Delta\Delta</math>::HIS3 carrying pRDN-hyg::URA3</i>                                    | (Nemoto et al., 2010) |
| NOY890<br>WT rRNA                      | <i>MATA ura3-1 leu2-3,112 his3-11 trp1-1 ade2-1 can1-100 rdna<math>\Delta\Delta</math>::HIS3 carrying pNOY373-WT rRNA::LEU2</i>                             | (Leppek et al., 2020) |
| NOY890<br>tagged-hES9S                 | <i>MATA ura3-1 leu2-3,112 his3-11 trp1-1 ade2-1 can1-100 rdna<math>\Delta\Delta</math>::HIS3 carrying tagged pNOY373-rRNA-hES9S::LEU2</i>                   | (Leppek et al., 2020) |
| RPS2-FLAG                              | <i>MATA ura3-1 leu2-3,112 his3-11 trp1-1 ade2-1 can1-100 rdna<math>\Delta\Delta</math>::HIS3 RPS2-FLAG::kanMX6 carrying pRDN-hyg::URA3</i>                  | This study            |
| RPS2-FLAG<br>WT rRNA                   | <i>MATA ura3-1 leu2-3,112 his3-11 trp1-1 ade2-1 can1-100 rdna<math>\Delta\Delta</math>::HIS3 RPS2-FLAG::kanMX6 carrying pNOY373-WT rRNA-hES9S::LEU2</i>     | This study            |
| RPS2-FLAG<br>tagged-hES9S              | <i>MATA ura3-1 leu2-3,112 his3-11 trp1-1 ade2-1 can1-100 rdna<math>\Delta\Delta</math>::HIS3 RPS2-FLAG::kanMX6 carrying pNOY373-tagged rRNA-hES9S::LEU2</i> | This study            |

**Table S3: DNA Oligonucleotides used in this study. Related to STAR Methods.**

All DNA oligonucleotides used for cloning, RT-PCR, and qRT-PCR are listed in the table. F, forward primer; R, reverse primer.

| <b>Table S3. DNA oligonucleotides</b> |                          |                         |
|---------------------------------------|--------------------------|-------------------------|
| <b>Name</b>                           | <b>Sequence</b>          | <b>Description</b>      |
| <i>qPCR primer</i>                    |                          |                         |
| KL050                                 | TGGAGAATAACTTCTTCGTGGA   | Rluc qPCR F             |
| KL051                                 | TTGGACGACGAACTTCACC      | Rluc qPCR R             |
| KL052                                 | AAGAGATACGCCCTGGTTC      | Fluc qPCR F             |
| KL053                                 | TTGTATTTCAGCCCATATCGTTTC | Fluc qPCR R             |
| KL318                                 | TGCAAACTCCTTGGTCACAC     | y-UsnRNA1(SNR19) qPCR F |



|       |                                                                        |                                    |
|-------|------------------------------------------------------------------------|------------------------------------|
| KL319 | CAAACCTCTCCAGGCAGAAG                                                   | y-UsnRNA1(SNR19) qPCR R            |
| KL320 | CCATCATGAAGTGTGATGTC                                                   | <i>y-actin1</i> qPCR F             |
| KL321 | GACCTTCATGGAAGATGGAG                                                   | <i>y-actin1</i> qPCR R             |
|       | <b>qPCR primer for rRNA detection</b>                                  |                                    |
| KL300 | CTAGGCGAACAAATGTTCTTAAAG                                               | pre-mature 25S rRNA F              |
| KL301 | GACCTCAAATCAGGTAGGAGTACCC                                              | mature 25S rRNA F                  |
| KL302 | CACCGAAGGTACTCGAGAGCTTC                                                | tagged 25S rRNA R                  |
| KL303 | CACCGAAGGTACCAGATTTC                                                   | endogenous 25S rRNA R              |
| KL304 | GCTTGTGCTTCTTCTTTAAGATAG                                               | pre-mature 18S rRNA F              |
| KL305 | TACAGTGAACCTGCGAATGGC                                                  | mature 18S rRNA F                  |
| KL306 | ATCTCTTCCAAAGGGTCGAG                                                   | endogenous 18S rRNA R              |
| KL307 | CGAGGATTCAGGCTTTGG                                                     | tagged 18S R                       |
|       | <b>PCR primer for rRNA strain characterization and ES9S sequencing</b> |                                    |
| KL314 | GAACGAGACCTTAACCTACTAAATAGT                                            | ES9S-span RT-PCR F                 |
| KL315 | AAACCGATAGTCCCTCTAAGAAGT                                               | ES9S-span RT-PCR R                 |
| KL316 | GCTAATACATGCTTAAAATCTCGA                                               | 18Stag-span RT-PCR F               |
| KL317 | TTTTTATCTAATAAATACATCTCTCCAA                                           | 18Stag-span RT-PCR R               |
| KL473 | TCGATCCCGTGGGTGGTGG                                                    | 18S rRNA-seq primer F              |
| KL474 | TAGCGCGCGTGCAGC                                                        | 18S rRNA-seq primer R              |
|       | <b>In vitro transcription DNA template primer</b>                      |                                    |
| KL414 | GCCGATTTAGGTGACACTATAGAAGAGctctggttgctctgtggg                          | IVT SP6-TIE primer F               |
| KL415 | CGGCATAAAGAATTGAAGAGAGTTTTCAC                                          | IVT Fluc primer R                  |
|       | <b>5' UTR-specific PCR primer</b>                                      |                                    |
| KL433 | gagcaaggggtgatctggccgGAATTCCTTTCTGTGGGAGCAGCC                          | T- <i>Rpl4</i> Gibson F            |
| KL435 | gagcaaggggtgatctggccgGAATTCAGAGGCTGGGGATTGCGTTA                        | T- <i>Hmgb2</i> Gibson F           |
| KL437 | gagcaaggggtgatctggccgGAATTCACACCCTCCTAAGGCC                            | T- <i>Hba-x</i> Gibson F           |
| KL438 | gagcaaggggtgatctggccgGAATTCCTGCTCTATGGTTGCGCC                          | T- <i>Sem1</i> Gibson F            |
| KL441 | gagcaaggggtgatctggccgGAATTCCTCATGTACAACTTTCTTCAACTCTTGT                | T- <i>Id1</i> Gibson F             |
| KL444 | gagcaaggggtgatctggccgGAATTCGGATTCTGCGTCTCTCGC                          | T- <i>Cct5</i> Gibson F            |
| KL445 | gagcaaggggtgatctggccgGAATTCCTTCTTTCTTAGCAGTTAACCGAGAGC                 | T- <i>Fubp1</i> Gibson F           |
| KL447 | gagcaaggggtgatctggccgGAATTCGATGCCTGAGCATCACTCGC                        | T- <i>Pdcd5</i> Gibson F           |
| KL449 | ATGTTTTTGGCGTCTTCCATGACGGGGAGAGGAGAAGG                                 | T- <i>Rpl4</i> Gibson R            |
| KL451 | ATGTTTTTGGCGTCTTCCATGACGACGGCGCGG                                      | T- <i>Hmgb2</i> Gibson R           |
| KL452 | ATGTTTTTGGCGTCTTCCATTGGGAGGAGCGGCTC                                    | T- <i>Rab10</i> Gibson R           |
| KL453 | ATGTTTTTGGCGTCTTCCATGGTGGTGGTGGTGGTGA                                  | T- <i>Hba-x</i> Gibson R           |
| KL454 | ATGTTTTTGGCGTCTTCCATCGCGCCGCGCC                                        | T- <i>Sem1</i> Gibson R            |
| KL457 | ATGTTTTTGGCGTCTTCCATGATCCTGAGAACAGGCGGAG                               | T- <i>Id1</i> Gibson R             |
| KL460 | ATGTTTTTGGCGTCTTCCATGGTGGACGAACTAGAACGAGC                              | T- <i>Cct5</i> Gibson R            |
| KL461 | ATGTTTTTGGCGTCTTCCATACCCACGCTACAGCACAC                                 | T- <i>Fubp1</i> Gibson R           |
| KL463 | ATGTTTTTGGCGTCTTCCATGGCGCGGCTGTCC                                      | T- <i>Pdcd5</i> Gibson R           |
| KL466 | CTCGAATCACTAGTCAGCTGGAATTC                                             | pRF-EcoRI F Gibson                 |
| KL469 | ATGTTTTTGGCGTCTTCCAT                                                   | Fluc-R Gibson                      |
| KL472 | CTCGAATCACTAGTCAGCTGGAATTCGACGCGGCGCCG                                 | EcoRI- <i>Rab10</i> (200nt) Gib. F |
| KL529 | CTCGAATCACTAGTCAGCTGGAATTCATGTTACAGAGCGGAGAGAGTGAG                     | <i>Hmgb1</i> Gib F                 |
| KL530 | CTCGAATCACTAGTCAGCTGGAATTCGCTCTTTCCCCGCCCA                             | <i>Rpl18</i> Gib F                 |
| KL532 | CTCGAATCACTAGTCAGCTGGAATTCGTCAGTGCAGGCGGG                              | <i>Raly</i> Gib F                  |
| KL533 | CTCGAATCACTAGTCAGCTGGAATTCGATTCCCTTCGGTCTTGGC                          | <i>Abcc5</i> Gib F                 |
| KL534 | CTCGAATCACTAGTCAGCTGGAATTCGCGGAGAGGCGG                                 | <i>Maged1</i> Gib F                |
| KL536 | ATGTTTTTGGCGTCTTCCATGTTTAGTTGATTTTCTCCGCGAGG                           | <i>Hmgb1</i> Gib R                 |
| KL537 | ATGTTTTTGGCGTCTTCCATGATGGCGCTCCTGCT                                    | <i>Rpl18</i> Gib R                 |

|       |                                                              |                         |
|-------|--------------------------------------------------------------|-------------------------|
| KL539 | ATGTTTTTGGCGTCTTCCATGGTGTTCACCAGTACCAAGAATGAG                | <i>Raly</i> Gib R       |
| KL540 | ATGTTTTTGGCGTCTTCCATCTTCACCACACAGAGGACCA                     | <i>Abcc5</i> Gib R      |
| KL541 | ATGTTTTTGGCGTCTTCCATAGCTCTCGTCTCCCTGG                        | <i>Maged1</i> Gib R     |
| KL554 | CTCGAATCACTAGTCAGCTGGAATTCAGCCACTCTTTCTCACGTCTG              | <i>Rpl5</i> Gib F       |
| KL555 | CTCGAATCACTAGTCAGCTGGAATTCAGTTAAAAGGAGGTGCAGGGCC             | <i>Gpx1</i> Gib F       |
| KL556 | CTCGAATCACTAGTCAGCTGGAATTCCTCAGCCCGTAGCCCG                   | <i>Tubb2b</i> Gib F     |
| KL557 | CTCGAATCACTAGTCAGCTGGAATTCAGTGTCTCCGGTACAGG                  | <i>Eno1</i> Gib F       |
| KL558 | ATGTTTTTGGCGTCTTCCATCTCGGGAATAGAGACCCG                       | <i>Rpl5</i> Gib R       |
| KL559 | ATGTTTTTGGCGTCTTCCATCTCGGTGTAGTCCCGGATC                      | <i>Gpx1</i> Gib R       |
| KL560 | ATGTTTTTGGCGTCTTCCATGGTGCCTGGTTAGCTTCTTGC                    | <i>Tubb2b</i> Gib R     |
| KL561 | ATGTTTTTGGCGTCTTCCATGGCGAATTTCTGGCAGTAGGATC                  | <i>Eno1</i> Gib R       |
| KL562 | CTCGAATCACTAGTCAGCTGGAATTCGCTCTTTCCCGCCCACTCCGGCGCGGTCCGTC   | <i>Rpl18-full</i> Gib F |
| KL563 | GTTTTTGGCGTCTTCCATGATGGCGCCTCCTGCTCGGCCAGGTCCGGAAAGACGGAACCG | <i>Rpl18-full</i> Gib R |
| KL565 | CTCGAATCACTAGTCAGCTGGAATTCATATAAAACCCGGCGGCGC                | <i>ActB</i> Gib F       |
| KL566 | ATGTTTTTGGCGTCTTCCATGGCGAACTGGTGGCG                          | <i>ActB</i> Gib R       |
|       | <b>Hybrid ES9S sequences</b>                                 |                         |
| 24 nt | CCTACTAAATAGTGGTGCTAGCATTGGCTGGTTATCCACTTCTTAGAGG            | Yeast WT ES9S           |
| 31 nt | CCTACTAAATAGTTACGCGACCCCGAGCGGTCGGCGTCCCCCAACTTCTTAGAGG      | hES9S                   |
| 16 nt | AAAGCCTGAATCCTCG                                             | 18S rRNA sequence tag   |
| 24 nt | GGTACTGAAGCTCTCGAGTGTACC                                     | 25S rRNA sequence tag   |

---
